# Supplementary material for: Transcriptional analysis of the intestinal mucosa of patients with ulcerative colitis in remission reveals lasting epithelial cell alterations
Source: HighWire-hosted journal article supplement (doi:10.1136/gutjnl-2012-303333), 2012-11-07
Supplement: gutjnl-2012-303333supp_table1.pdf [file gutjnl-2012-303333supp_table1.pdf]

**Planell N et al. Supplementary Material**

**Supplementary Table 1. List of genes and probes validated by real-time RT-PCR or used as endogenous controls (\*).**

| <b>Assay ID</b> | <b>Gene Symbol</b> | <b>Gene Name</b>                                                                   |
|-----------------|--------------------|------------------------------------------------------------------------------------|
| Hs00984887_g1   | REG1A              | regenerating islet-derived 1 alpha                                                 |
| Hs00175474_m1   | DEFB4              | defensin, beta 4                                                                   |
| Hs01567913_g1   | IL8                | interleukin 8                                                                      |
| Hs01555413_m1   | IL1B               | interleukin 1, beta                                                                |
| Hs00233987_m1   | MMP10              | matrix metalloproteinase 10 (stromelysin 2)                                        |
| Hs00607029_g1   | CXCL5              | chemokine (C-X-C motif) ligand 5                                                   |
| Hs01011368_m1   | CCL20              | chemokine (C-C motif) ligand 20                                                    |
| Hs00268113_m1   | CCL18              | chemokine (C-C motif) ligand 18                                                    |
| Hs01072228_m1   | CHI3L1             | chitinase 3-like 1 (cartilage glycoprotein-39)                                     |
| Hs01028971_m1   | COL1A2             | collagen, type I, alpha 2                                                          |
| Hs00605382_gH   | CXCL1              | chemokine (C-CX-C motif) ligand 1                                                  |
| Hs00171061_m1   | CXCL3              | chemokine (C-X-C motif) ligand 3                                                   |
| Hs00378230_g1   | IGHG3              | immunoglobulin heavy constant gamma 3 (G3m marker)                                 |
| Hs00893626_m1   | IL1RN              | interleukin 1 receptor antagonist                                                  |
| Hs00902338_g1   | IL7R               | interleukin 7 receptor                                                             |
| Hs00899660_g1   | MMP1               | matrix metalloproteinase 1 (interstitial collagenase)                              |
| Hs00968308_m1   | MMP3               | matrix metalloproteinase 3 (stromelysin 1, progelatinase)                          |
| Hs00944732_m1   | NFKBIZ             | nuclear factor of kappa light polypeptide gene enhancer in B-cells inhibitor, zeta |
| Hs01069973_m1   | REG4               | regenerating islet-derived family, member 4                                        |
| Hs00932734_m1   | TGFBI              | transforming growth factor, beta-induced, 68kDa                                    |
| Hs00355335_g1   | TIMP1              | TIMP metalloproteinase inhibitor 1                                                 |
| Hs01007937_m1   | VCAN               | versican                                                                           |
| Hs01546812_m1   | VNN1               | vanin 1                                                                            |
| Hs01086280_g1   | AQP8               | aquaporin 8                                                                        |
| Hs01053787_m1   | ABCG2              | ATP-binding cassette, sub-family G (WHITE), member 2                               |
| Hs00380895_m1   | OSTalpha           | organic solute transporter alpha                                                   |
| Hs00376974_m1   | PRAP1              | proline-rich acidic protein 1                                                      |
| Hs00161826_m1   | SLC16A1            | solute carrier family 16, member 1                                                 |
| Hs00195535_m1   | MEP1B              | mepirin A, beta                                                                    |
| Hs00608345_m1   | DEFB1              | defensin, beta 1                                                                   |
| Hs00289927_m1   | RUNDC3B            | RUN domain containing 3B                                                           |
| Hs01074241_m1   | ACOX1              | acyl-Coenzyme A oxidase 1, palmitoyl                                               |
| Hs00184824_m1   | ABCB11             | ATP-binding cassette, sub-family B (MDR/TAP), member 11                            |
| Hs00167423_m1   | ADH6               | alcohol dehydrogenase 6 (class V)                                                  |
| Hs00196213_m1   | IRF6               | interferon regulatory factor 6                                                     |
| Hs00416321_m1   | MUC20              | mucin 20, cell surface associated                                                  |
| Hs00998193_m1   | SMAD7              | SMAD family member 7                                                               |
| Hs00543824_m1   | TJP1               | tight junction protein 1 (zona occludens 1)                                        |
| Hs00794121_m1   | IL6R               | interleukin 6 receptor                                                             |
| Hs00366414_m1   | MUC4               | mucin 4, cell surface associated                                                   |
| Hs01069872_m1   | CD180              | CD180 molecule                                                                     |
| Hs01547083_m1   | ACSL4              | acyl-CoA synthetase long-chain family member 4                                     |
| Hs00185020_m1   | AQP3               | aquaporin 3 (Gill blood group)                                                     |
| Hs00861588_m1   | MUC5B              | mucin 5B, oligomeric mucus/gel-forming                                             |
| Hs00170216_m1   | TFF1               | trefoil factor 1                                                                   |
| Hs00275975_m1   | LILRB2             | leukocyte immunoglobulin-like receptor, subfamily B, member 2                      |
| Hs01848117_s1   | LILRB1             | leukocyte immunoglobulin-like receptor, subfamily B, member 1                      |

|               |          |                                                           |
|---------------|----------|-----------------------------------------------------------|
| Hs00195584_m1 | S100P    | S100 calcium binding protein P                            |
| Hs01554892_m1 | ME1      | malic enzyme 1, NADP(+)-dependent, cytosolic              |
| Hs00197918_m1 | TFPI2    | tissue factor pathway inhibitor 2                         |
| Hs00998537_m1 | WNT5A    | wingless-type MMTV integration site family, member 5A     |
| Hs00748445_s1 | GJA1     | gap junction protein, alpha 1, 43kDa                      |
| Hs00232590_m1 | TRIM29   | tripartite motif-containing 29                            |
| Hs00985283_m1 | SERPINB5 | serpin peptidase inhibitor, clade B (ovalbumin), member 5 |
| Hs00420895_gH | RPLP0*   | ribosomal protein, large, P0                              |
| Hs03023880_g1 | ACTB*    | actin, beta                                               |
| Hs03005117_g1 | RPS2*    | ribosomal protein S2                                      |
| Hs00744842_sH | TUBA1B*  | tubulin, alpha 1 b                                        |
| Hs00181460_m1 | PPIC*    | peptidylprolyl isomerase C (cyclophilin C)                |
| Hs00234368_m1 | UBA3*    | ubiquitin-like modifier activating enzyme 3               |
| Hs00828752_gH | RPS20*   | ribosomal protein S20                                     |
| Hs00832893_sH | RPS3A*   | ribosomal protein S3A                                     |
| Hs99999901_s1 | 18S*     | Eukaryotic 18S rRNA                                       |

---
