# Supplementary material for: Transcriptional analysis of the intestinal mucosa of patients with ulcerative colitis in remission reveals lasting epithelial cell alterations
Source: HighWire-hosted journal article supplement (doi:10.1136/gutjnl-2012-303333), 2012-11-07
Supplement: gutjnl-2012-303333supp_table2.pdf [file gutjnl-2012-303333supp_table2.pdf]

**Planell N et al. Supplementary Material**

**Supplementary Table 2. Biological pathways analysis by IPA.** Pathway analysis was performed for those genes significantly perturbed in affected colonic biopsies from UC active and UC-in-remission samples compared to non-IBD controls (Supplementary Table 2A) or in UC active involved compared to non-IBD controls (Supplementary Table 2B), using Ingenuity Pathways Analysis (Ingenuity™ Systems, [www.ingenuity.com](http://www.ingenuity.com)).

In bold are shown those genes that were included in the real-time RT-PCR validation set.

**Supplementary Table 2A.** Main biological functions significantly perturbed in deregulated genes in both active and inactive UC versus non-IBD controls (patterns 2 and 3 of gene expression, Figure 2).

| <b>Biological functions</b>                                                                                                                                                                                                                                                                                                                         | <b>Genes</b>                                                                                                                                                                                                                                                                                                                                                                              |
|-----------------------------------------------------------------------------------------------------------------------------------------------------------------------------------------------------------------------------------------------------------------------------------------------------------------------------------------------------|-------------------------------------------------------------------------------------------------------------------------------------------------------------------------------------------------------------------------------------------------------------------------------------------------------------------------------------------------------------------------------------------|
| <u>Cell communication:</u><br>attachment of cells,<br>cell-cell contact,<br>disassembly of focal adhesions,<br>adhesion of connective<br>tissue cells,<br>formation of tight junctions                                                                                                                                                              | <b>SERPINB5</b> , SLC4A2, TGFB1, <b>TGFBI</b> , VCAM1,<br>DSG2, ICAM2, ITGA2, ITGA6, PTEN, PTGER2,<br><b>TFPI2</b> , TGFA, TGM2, <b>VCAN</b> , DSP, JAM2, JAM3,<br><b>GJA1</b> , OCLN, PARD3, <b>TJP1</b> , TJP3                                                                                                                                                                          |
| <u>Cell death:</u><br>cell death of epithelial cell lines,<br>cytotoxicity of tumor cell lines,<br>apoptosis of endothelial cells,<br>apoptosis of vascular<br>endothelial cells,<br>apoptosis of microvascular<br>endothelial cells                                                                                                                | FAS, FOXO3, GATA6, HGF, ITSN1, KLF5, LUM,<br>MAP3K5, MAPK14, PARP1, SERPINA1,<br><b>SERPINB5</b> , TGFB1, THBS1, TLR3, TNFRSF10A,<br>TNFRSF10B, TNFRSF11B, TNFSF10, <b>ABCG2</b> , JUN,<br>MAP2K6, MET, PEA15, TCF3, TCF4, TGFA,<br>TGFB1I1, TICAM1, TICAM2, TNFRSF1B, TRIM27,<br><b>SMAD7</b> , TGFB2                                                                                    |
| <u>Cellular assembly and<br/>organization:</u><br>organization of actin and<br>cytoskeleton,<br>quantity of centrosome,<br>proliferation of peroxisomes,<br>induction of filaments,<br>induction of actin stress fibers,<br>fusion of liposome,<br>formation of actin bundles,<br>development of cytoplasm,<br>stabilization of plasma<br>membrane, | ABCD3, AKAP1, AKAP2/PALM2-AKAP2, ANG,<br>ANKRD27, COL18A1, CTNND1, GAS7, GDA,<br>GJC1, GNA11, GNA13, GNAQ, GNAS, GNG12,<br>HGF, IPO4, JAG1, LAMP1, LAMP2, LIMK2,<br>MAP1B, MAP1LC3A, MMP2, STAT3, SYNPO,<br>TESK2, TGFB1, <b>TGFBI</b> , TPM2, TUBB, TWF1,<br>UTRN, VCAM1, VIL1, WASL, XIAP, ZYX, ACTN1,<br>MYO1B, DCN, SMAD4, <b>SMAD7</b> , CALD1, <b>ACOX1</b> ,<br><b>TJP1</b> , TJP3 |

|                                                                                                                                                                                                                                                                                                  |                                                                                                                                                                                                                                                                                                                                                                                                                                                                                                                                                                                        |
|--------------------------------------------------------------------------------------------------------------------------------------------------------------------------------------------------------------------------------------------------------------------------------------------------|----------------------------------------------------------------------------------------------------------------------------------------------------------------------------------------------------------------------------------------------------------------------------------------------------------------------------------------------------------------------------------------------------------------------------------------------------------------------------------------------------------------------------------------------------------------------------------------|
| remodeling of actin filaments                                                                                                                                                                                                                                                                    |                                                                                                                                                                                                                                                                                                                                                                                                                                                                                                                                                                                        |
| <u>Cellular growth and proliferation:</u><br>proliferation of colon cancer cell lines,<br>colony formation of tumor cell lines,<br>proliferation of colon carcinoma cells                                                                                                                        | CADM1, CAV1, CLU, CTSD, E2F5, EDN1, EGFR, ELF3, ENO1, FOXA2, FOXO3, GADD45B, <b>GJA1</b> , HGF, HMGA1, IGFBP7, <b>IL6R</b> , IL6ST, IP6K2, IRS1, KLF4, KLF6, NDRG1, NEK6, NF1, RUNX2, SERPINA1, SLPI, <b>SMAD7</b> , SPARC, STEAP2, <b>TFF1</b> , TNFSF10, TRIM22, VIP, ZEB1, DAPK2, NEDD9, NR5A2, PAK1, PDLIM4, PECAM1, PLD1, PPARG, SDC2, SLC26A2, SLC26A3, TCF4, TGFA, TGFBR2                                                                                                                                                                                                       |
| <u>Cellular movement:</u><br>invasion of cancer cells,<br>migration of cancer cells,<br>invasion of colon cancer cell lines                                                                                                                                                                      | CXCL12, ITGA2, ITGA6, <b>SERPINB5</b> , TGFB1, TGFBR1, BSG, CD82, EGFR, TGFA, TGFBR2, FGFR1, TIMP3, <b>WNT5A</b> , ANPEP, CCDC88A, CD24, CD44, CD9, CDC25B, CDH11, CLDN3, EPHB4, GAB1, GAB2, GEM, <b>GJA1</b> , GJB1, IGF2, ITGAV, JAM3, JUN, JUP, LAMA5, LAMC1, LCN2, <b>LILRB1</b> , <b>MMP3</b> , RUNX2, RUNX3, <b>S100P</b> , SDC2, SDCBP, SERP1, SERPINA1, SERPINE2, SLC9A3R1, SMAD4, <b>SMAD7</b> , STAT3, STK38L, SYK, TAGLN, TCF3, TCIRG1, <b>TFF1</b> , TFF2, <b>TFPI2</b> , <b>TGFBI</b> , THBS1, <b>TIMP1</b> , <b>TJP1</b> , TNFSF10, VAV3, <b>VCAN</b> , VDR, WWTR1, XIAP |
| <u>Extracellular matrix:</u><br>ruffling of fibroblast cell lines,<br>shape change of fibroblast cell lines,<br>adhesion of stromal cells,<br>cell spreading of fibroblast cell lines,<br>blebbing of fibroblast cell lines                                                                      | VCAM1, CDC42SE2, FAS, MARCKS, NF2, ROCK1, TNFRSF10B, ASAP1, CAST, DAB2, EFNA1, FLNA, FLNC, FN1, MET, PALLD, PTBP1, TGFB1I1, THBS1, TNIK, TSPAN7, VAV3, VCL, VIM, DIAPH1, INSR, NCK2, PTEN, RAB4A, AKAP12, ARHGEF11, FGD4, GNG12, ITGA6, MAPK14, ZAK                                                                                                                                                                                                                                                                                                                                    |
| <u>Fatty acid metabolism:</u><br>synthesis of sterol and cholesterol,<br>oxidation of lipids,<br>accumulation of lipid,<br>concentration of phospholipid,<br>concentration of fatty acid,<br>conversion of lipid,<br>beta-oxidation of fatty acid,<br>export of lipid,<br>fatty acid metabolism, | <b>ABCB11</b> , ABHD5, ACACA, ACAT1, <b>ACOX1</b> , AQP7, <b>IL1RN</b> , INSIG1, INSR, PIK3C2B, PIK3CB, PON2, SLC36A1, SREBF2, SYK, <b>TIMP1</b> , UCP2, VIP, ABCD3, ACAA2, ACADM, ACADS, ACADSB, <b>ACOX2</b> , ACSL5, <b>ACSL4</b> , MMP12, <b>MMP3</b> , MSN, RXRB, STX12, ABCB1, ABCC6, ACAA1, ACBD3, ACOT4, ACOT8, ACOT9, ACSL3, ACSM3, ANXA1,                                                                                                                                                                                                                                    |

|                                                                                                                                                                                                                                     |                                                                                                                                                                                                                                                                                                                                                                                                                                                                                                                                                                                                        |
|-------------------------------------------------------------------------------------------------------------------------------------------------------------------------------------------------------------------------------------|--------------------------------------------------------------------------------------------------------------------------------------------------------------------------------------------------------------------------------------------------------------------------------------------------------------------------------------------------------------------------------------------------------------------------------------------------------------------------------------------------------------------------------------------------------------------------------------------------------|
| efflux of cholesterol                                                                                                                                                                                                               | <b>AQP8, ME1, ME3, SLC27A3</b>                                                                                                                                                                                                                                                                                                                                                                                                                                                                                                                                                                         |
| <u>Immune cell trafficking:</u><br>detachment of phagocytes                                                                                                                                                                         | ANXA1, ANXA5, PTPRC, SIRPA                                                                                                                                                                                                                                                                                                                                                                                                                                                                                                                                                                             |
| <u>Molecular transport:</u><br>secretion of hyaluronic acid,<br>uptake of L-amino acid,<br>import of protein,<br>transport of oleic acid,<br>transport of carbohydrate,<br>uptake of essential amino acids,<br>secretion of protein | AQP11, <b>AQP3</b> , AQP7, FABP1, INSR, IRS1, LYN,<br>MAP4K4, SLC23A1, SLC35A3, SLC35B4,<br>SLC37A4, ACSL3, <b>ACSL4</b> , ACSL5, SLC3A1,<br>SLC6A19, SLC7A1, SLC7A5, SLC1A1, SLC36A1,<br>SLC7A11                                                                                                                                                                                                                                                                                                                                                                                                      |
| <u>Organismal injury and abnormalities:</u><br>edema                                                                                                                                                                                | ABCA5, ABI1, AHR, ATP2A2, BCR, C1S, CA1,<br>CA12, CA2, CAV1, CBF3, CCND2, CD93, CLU,<br>COL18A1, CTSA, CXADR, DOCK1, E2F3, ECE1,<br>EDN1, EDNRA, ENG, ENPP2, ENTPD1, ERCC6,<br>F2R, F2RL1, F3, FBXW7, FCGRT, FKBP1A, FLNA,<br>FLRT2, FLT1, FOXP1, GATA6, <b>GJA1</b> , GPX2, HGF,<br>HHEX, HIF1A, HMOX1, HSD17B7, IFT57, IGF2,<br>IKBKB, IRAK3, ITGAV, JUN, PECAM1, PLAT,<br>PODXL, POR, PRKAR1A, PTGER4, RXRA, SCP2,<br>SERPING1, SETD2, SIRT1, SLC12A2, SMAD5,<br><b>SMAD7</b> , SOD3, SPRED1, SYK, TGFB1, TIMP3,<br>TNFAIP6, UBE4B                                                                  |
| <u>Protein metabolism:</u><br>degradation of protein,<br>metabolism of protein                                                                                                                                                      | ANPEP, CASP6, CASP7, CAST, CAT, CAV1, CBLC,<br>CD46, CDC37, CDKN2AIP, CTSB, CTSC, CTSD,<br>CTSH, FBXL12, FBXL4, FBXO3, FBXO32, FBXO8,<br><b>GJA1, IL1RN</b> , IRAK3, ITCH, LAMP2, LNX1, LPL,<br>MMP12, MMP2, <b>MMP3</b> , MYLIP, SERPINA1,<br>SERPINB1, SERPINE2, TIMP3, TOPORS, VCP,<br><b>WNT5A</b> , EEF1A1, EEF2K, EIF2B2, EIF2B3,<br>EIF2B4, EIF2B5, EIF2S1, EIF2S2, EIF3B, EIF3I,<br>EIF4A1, EIF4B, EIF4E2, EIF4EBP2, EIF4G1, EIF5B,<br>ETF1, <b>IL7R</b> , INSR, IRS1, ITGA2, JUN, LARP4B,<br>LYN, MARS, SENP3, SERINC1, SERP1, SLC46A1,<br>SLC7A1, SNRNP70, STIP1, THBS1, TNFRSF9,<br>TNFSF10 |
| <u>Tissue Morphology:</u>                                                                                                                                                                                                           | APP, KLF4, PTEN, SLC4A2, TFF2, TGFA, BMP8B,                                                                                                                                                                                                                                                                                                                                                                                                                                                                                                                                                            |

|                                        |                                                                |
|----------------------------------------|----------------------------------------------------------------|
| quantity of glandular epithelial cells | CXCL12, EPAS1, IL6ST, SMAD5, TGFB1, <b>WNT5A</b> , ZFX, ZNF148 |
|----------------------------------------|----------------------------------------------------------------|

**Supplementary Table 2B.** Main biological functions significantly perturbed in deregulated genes in active UC versus non-IBD controls (pattern 1 of gene expression, Figure 2).

| <b>Biological functions</b>                                                                                                                                                                                                                                                                                                                                              | <b>Genes</b>                                                                                                                                                                                                                                                                                                                                                                  |
|--------------------------------------------------------------------------------------------------------------------------------------------------------------------------------------------------------------------------------------------------------------------------------------------------------------------------------------------------------------------------|-------------------------------------------------------------------------------------------------------------------------------------------------------------------------------------------------------------------------------------------------------------------------------------------------------------------------------------------------------------------------------|
| <u>Cell death:</u><br>apoptosis of tumor cell lines,<br>cell death of endothelial cells,<br>necrosis,<br>cell viability,<br>cell death of blood cells,<br>cell survival,<br>apoptosis,<br>cell viability of tumor cell lines,<br>cell death of immune cells,<br>cell death,<br>cell death of connective tissue cells                                                     | <b>NFKBIZ</b> , KLF7, SPIB, NCOA7, MNDA, FOXQ1, EGR3, PARP14, PHTF1, ELL2, CEBPD, ETV7                                                                                                                                                                                                                                                                                        |
| <u>Cellular growth and proliferation:</u><br>proliferation of cells,<br>proliferation of endothelial cells,<br>colony formation of cells,<br>proliferation of blood cells,<br>proliferation of fibroblasts,<br>proliferation of tumor cell lines,<br>proliferation of connective tissue cells,<br>proliferation of immune cells,<br>colony formation of tumor cell lines | SOCS 3, SOCS1, IFI6, HSP90B1, IFI16, RIPK2, CASP1, PRLR, TIMP3, ELMO1, PROK2, BIRC3, BCL2A1, CD27, ITGB2, CKAP2, IL8RB, CYCS, DDIT4, TRIM69, AIFM3, IL17A, GZMB, GPR65, RASSF5, EAF2, TGM2, SEMA4D, CEBPB, IL1A, <b>IL1B</b> , CD38, DLC1, SRGN, AGT, BCL6, CASP4, COPI, <b>REG1A</b> , REG1B, VEGFC, S1P1, RETNLB, IFITM1, BCAT1, REG3A, TIMP2, PTGS2, SHH, CRIP2, BCL6, IHH |
| <u>Cellular movement:</u><br>migration of cells,<br>homing,<br>cell movement of PBMCs,<br>migration of tumor cells,<br>infiltration of blood cells,<br>recruitment of antigen presenting cells,<br>cell movement of fibroblast cell lines,<br>chemotaxis,<br>cell movement of antigen presenting cells,<br>recruitment of cells,<br>cell movement of endothelial cells   | NCF2, NCF4, MMP9, RHOH, CYBB, CD27, IL17A, IL1A, <b>IL1B</b> , <b>IL8</b> , CCL2, CXCL2, PF4, IL17RB, CCR10, <b>CXCL5</b> , CCL24, CCR2, TNFRSF17, CXCL6, CSF2RB, CXCR4, IL8RB, OSMR, IL15RA, CSF3R, <b>IL7R</b> , VEGFC, GHR, PRLR, CXCL10, CCL3, CCL4, CSCL11, CXCL9, IFNAR2, PF4, OSRM                                                                                     |

|                                                                                                                                                                                                                                                                                                                                                                                                                                                                                                                                                     |                                                                                                                                                                                                                                                                                                                                                                                                                                                    |
|-----------------------------------------------------------------------------------------------------------------------------------------------------------------------------------------------------------------------------------------------------------------------------------------------------------------------------------------------------------------------------------------------------------------------------------------------------------------------------------------------------------------------------------------------------|----------------------------------------------------------------------------------------------------------------------------------------------------------------------------------------------------------------------------------------------------------------------------------------------------------------------------------------------------------------------------------------------------------------------------------------------------|
| <p><u>Hematological system development and functional communication:</u><br/> quantity of hematopoietic cells,<br/> development of lymphocytes,<br/> development of blood cells,<br/> development of leukocytes,</p>                                                                                                                                                                                                                                                                                                                                | <p>CCL3, CCND1, CCND3, CCR2, CCR7, CD19, CD2, CD74, CD79A, CD81, CD86, CD9, CDK13, CDK6, CDKN1B, CEBPA, CREB1, CREBBP, CRIP2, CSF1R, CSF2RB, CUX1, CXCL11, CXCL12, CXCR4, CYLD, DEF6, DFFB, IFNGR1, IFNGR2, IGF1R, IGF2, IGHM, IHH, IKBKB, IKZF1, IL12RB1, IL15RA, IL18, IL18R1, IL1A, <b>IL1B</b>, IL1R1, <b>IL1RN</b>, IL23A, IL27RA, IL2RA, IL2RB, <b>IL6R</b>, IL6ST, <b>IL7R</b></p>                                                          |
| <p><u>Immune cell trafficking:</u><br/> infiltration by neutrophils,<br/> chemotaxis of leukocytes,<br/> adhesion of lymphocytes,<br/> adhesion of phagocytes,<br/> chemotaxis of phagocytes,<br/> chemotaxis of granulocytes,<br/> infiltration of granulocytes,<br/> infiltration of leukocytes,<br/> homing of phagocytes,<br/> chemotaxis of neutrophils,<br/> recruitment of antigen presenting cells,<br/> adhesion of immune cells,<br/> migration of neutrophils,<br/> chemotaxis of lymphocytes,<br/> cell movement of dendritic cells</p> | <p>NCF2, NCF4, MMP9, RHOH, CYBB, CD27, IL17A, IL1A, <b>IL1B</b>, <b>IL8</b>, CCL2, CXCL2, PF4, IL17RB, CCR10, <b>CXCL5</b>, CCL24, CCR2, TNFRSF17, CXCL6, CSF2RB, CXCR4, IL8RB, OSMR, IL15RA, CSF3R, <b>IL7R</b>, VEGFC, GHR, PRLR, CXCL10, CCL3, CCL4, CSCL11, CXCL9, IFNAR2, PF4, OSRM</p>                                                                                                                                                       |
| <p><u>Inflammatory response:</u><br/> response of phagocytes,<br/> response of macrophages,<br/> inflammatory response,<br/> immune response of phagocytes,<br/> activation of leukocytes,<br/> cell movement of neutrophils,<br/> activation of antigen presenting cells,<br/> immune response of antigen presenting cells,<br/> activation of phagocytes,<br/> immune response of cells,<br/> activation of mononuclear leukocytes,<br/> activation of lymphocytes</p>                                                                            | <p>IFI30, CD74, HLA-DRA, HLA-DRB5, HLA-DRB1, HLA-DMA, TAP2, <b>DEFB4</b>, DEFA5, DEFA6, S100A12, NOS2A, CSF3R, NLRP7, SP140, MX2, CYSLTR1, DARC, RTP4, TLR8, IL17RB, TLR1, NLRP1, TOLLIP, IGHM, IGL@, IGKC, IGHG1, IGHG3, IGHD, CLEC4E, CD64, IGHA1, <b>LILRB1</b>, <b>LILRB2</b>, GBP1, GBP5, GBP2, PAG1, SAMHD1, FCGR2C, FCGR3B, SERPINB4, LCP2, MICB, CLEC7A, CD93, <b>VNN1</b>, <b>IL8</b>, CD27, GPR65, CEBPB, BST2, TREM1, IFITM2, IGFS6</p> |
| <p><u>Tissue morphology:</u><br/> quantity of lymphocytes,<br/> quantity of blood cells,<br/> quantity of leukocytes,<br/> quantity of antigen</p>                                                                                                                                                                                                                                                                                                                                                                                                  | <p><b>MMP10</b>, MMP28, MMP7, MMP9, PLAU, SERPINB4, SERPINE2, ADAM9, CAPN13, CPA3, MME, COLA42, MFAP2, ADAMTS5, FBN1, TIMP3,</p>                                                                                                                                                                                                                                                                                                                   |

|                                                                                                     |                                                                                                                                                                                                                              |
|-----------------------------------------------------------------------------------------------------|------------------------------------------------------------------------------------------------------------------------------------------------------------------------------------------------------------------------------|
| presenting cells,<br>invasion of cancer cells,<br>apoptosis of tumor cells,<br>progression of tumor | NTN2L, BGN, MMRN2, E-SELECTIN, SELPLG,<br><b>VCAN</b> , L-SELECTIN, P-SELECTIN, ITGAM,<br>PECAM1, ICAM1, ITGB2, JAM2, CLDN8, CLDN2,<br>CLDN23, CLDN1, CD86, VWF, COL4A2, CD44,<br>ITGA8, CLEC4A, SLAMF7, CD300A, NRP1, PTPRC |
|-----------------------------------------------------------------------------------------------------|------------------------------------------------------------------------------------------------------------------------------------------------------------------------------------------------------------------------------|
