# Supplementary material for: Transcriptional analysis of the intestinal mucosa of patients with ulcerative colitis in remission reveals lasting epithelial cell alterations
Source: HighWire-hosted journal article supplement (doi:10.1136/gutjnl-2012-303333), 2012-11-07
Supplement: gutjnl-2012-303333supp_table3.pdf [file gutjnl-2012-303333supp_table3.pdf]

**Planell N et al. Supplementary Material**

**Supplementary Table 3. Comparison of relative changes in gene expression as assessed by microarray and real-time RT-PCR analysis.** Microarray analysis was performed for 36 samples (cohort 1) and real-time RT-PCR for an independent group of 30 individuals (cohort2). Gene expression differences between groups are expressed as log<sub>2</sub> ratio. Technical validation was performed by Pearson's correlation test on 15 samples from cohort 1 that had been analyzed by both methods. A p-value < 0.05 was considered statistically significant.

| Gene Symbol | Microarray<br>(cohort 1) |                        | Real-time RT-PCR<br>(cohort 2) |                        | Pearson<br>correlation(r) | p-value                |
|-------------|--------------------------|------------------------|--------------------------------|------------------------|---------------------------|------------------------|
|             | log <sub>2</sub> ratio   | log <sub>2</sub> ratio | log <sub>2</sub> ratio         | log <sub>2</sub> ratio |                           |                        |
|             | CUI/Ctrl                 | CUA+/Ctrl              | CUI/Ctrl                       | CUA+ / Ctrl            |                           |                        |
| ABCB11      | -2.049                   | -2.117                 | -0.061                         | -1.299                 | 0.817                     | 0.0002                 |
| ABCG2       | -4.828                   | -5.766                 | -2.237                         | -3.055                 | 0.985                     | 3.23x10 <sup>-11</sup> |
| ACOX1       | -2.137                   | -1.769                 | -0.957                         | -1.117                 | 0.936                     | 3.04x10 <sup>-07</sup> |
| ACSL4       | 1.508                    | 1.802                  | 1.237                          | 2.602                  | 0.894                     | 6.87x10 <sup>-06</sup> |
| ADH6        | -1.757                   | -1.353                 | -0.729                         | -1.191                 | 0.927                     | 6.49x10 <sup>-07</sup> |
| AQP3        | 2.697                    | 2.265                  | 2.015                          | 1.624                  | 0.949                     | 6.55x10 <sup>-08</sup> |
| AQP8        | -5.658                   | -8.614                 | -3.238                         | -5.901                 | 0.964                     | 3.04x10 <sup>-08</sup> |
| CCL18       | 1.254                    | 3.930                  | 0.548                          | 2.754                  | 0.980                     | 1.46x10 <sup>-10</sup> |
| CCL20       | 0.295                    | 2.054                  | 0.874                          | 0.484                  | 0.991                     | 7.36x10 <sup>-12</sup> |
| CD180       | 0.580                    | 1.319                  | 0.658                          | 1.684                  | 0.877                     | 1.80x10 <sup>-05</sup> |
| CHI3L1      | 1.865                    | 6.871                  | 3.619                          | 9.290                  | 0.939                     | 2.19x10 <sup>-07</sup> |
| COL1A2      | 1.101                    | 2.521                  | 0.155                          | 2.805                  | 0.974                     | 9.51x10 <sup>-10</sup> |
| CXCL1       | 1.140                    | 5.437                  | 0.928                          | 4.398                  | 0.980                     | 1.79x10 <sup>-10</sup> |
| CXCL3       | 1.125                    | 4.436                  | 0.932                          | 3.526                  | 0.989                     | 3.16x10 <sup>-12</sup> |
| CXCL5       | -0.137                   | 6.092                  | 2.004                          | 5.529                  | 0.974                     | 9.32x10 <sup>-08</sup> |
| DEFB1       | -3.198                   | -3.687                 | -0.945                         | -1.710                 | 0.970                     | 2.43x10 <sup>-09</sup> |
| DEFB4       | 0.287                    | 5.919                  | ---                            | ---                    | -0.158                    | 0.6622                 |
| GJA1        | 2.382                    | 2.857                  | 1.057                          | 2.071                  | 0.921                     | 1.08x10 <sup>-06</sup> |
| IGHG3       | 0.004                    | 2.874                  | 0.432                          | 5.894                  | 0.828                     | 0.0159                 |
| IL1B        | 0.411                    | 4.524                  | 1.402                          | 4.226                  | 0.988                     | 4.40x10 <sup>-11</sup> |
| IL1RN       | 4.910                    | 6.035                  | 2.990                          | 3.667                  | 0.977                     | 2.19x10 <sup>-09</sup> |
| IL6R        | -0.967                   | -1.068                 | -0.512                         | -0.771                 | 0.829                     | 0.0001                 |
| IL7R        | 1.742                    | 2.918                  | 0.379                          | 1.243                  | 0.941                     | 5.36x10 <sup>-07</sup> |
| IL8         | -0.441                   | 4.986                  | 0.710                          | 4.887                  | 0.970                     | 1.05x10 <sup>-08</sup> |
| IRF6        | -0.873                   | -0.836                 | -0.366                         | -0.951                 | 0.860                     | 3.92x10 <sup>-05</sup> |
| LILRB1      | 1.257                    | 1.929                  | ---                            | ---                    | 0.343                     | 0.2112                 |
| LILRB2      | 0.811                    | 2.161                  | 0.882                          | 2.868                  | 0.820                     | 0.0002                 |
| ME1         | 2.301                    | 2.795                  | 2.727                          | 2.509                  | 0.977                     | 4.61x10 <sup>-10</sup> |
| MEP1B       | -3.487                   | -3.182                 | -1.161                         | -0.780                 | 0.940                     | 2.00x10 <sup>-07</sup> |
| MMP1        | 4.622                    | 6.949                  | 3.783                          | 6.805                  | 0.968                     | 3.55x10 <sup>-09</sup> |
| MMP10       | 1.390                    | 5.597                  | 3.376                          | 5.610                  | 0.908                     | 2.84x10 <sup>-06</sup> |
| MMP3        | 3.446                    | 7.474                  | 4.497                          | 8.471                  | 0.878                     | 1.69x10 <sup>-05</sup> |
| MUC20       | -0.936                   | -0.470                 | -0.074                         | -0.598                 | 0.888                     | 9.80x10 <sup>-06</sup> |
| MUC4        | 1.070                    | 1.519                  | 0.517                          | 0.343                  | 0.907                     | 3.15x10 <sup>-06</sup> |
| MUC5B       | 1.723                    | 1.790                  | 0.798                          | 0.950                  | 0.864                     | 0.0002                 |
| NFKBIZ      | 0.136                    | 1.903                  | 0.072                          | 1.560                  | 0.964                     | 8.03x10 <sup>-09</sup> |
| OSTalpha    | -4.591                   | -4.554                 | 0.986                          | -0.283                 | 0.942                     | 1.53x10 <sup>-07</sup> |
| PRAP1       | -4.201                   | -4.102                 | -1.672                         | -1.073                 | 0.986                     | 1.54x10 <sup>-11</sup> |
| REG1A       | 0.498                    | 10.822                 | 1.757                          | 10.413                 | 0.922                     | 7.42x10 <sup>-06</sup> |
| REG4        | 3.845                    | 5.021                  | 4.504                          | 4.651                  | 0.995                     | 2.78x10 <sup>-14</sup> |

|          |        |        |        |        |       |                        |
|----------|--------|--------|--------|--------|-------|------------------------|
| RUNDC3B  | -1.871 | -2.782 | -1.187 | -1.618 | 0.963 | 9.42x10 <sup>-09</sup> |
| S100P    | 2.902  | 2.684  | 3.698  | 3.102  | 0.971 | 1.78x10 <sup>-09</sup> |
| SERPINB5 | 4.613  | 5.794  | 3.927  | 3.318  | 0.995 | 1.64x10 <sup>-14</sup> |
| SLC16A1  | -2.939 | -2.833 | -1.526 | -1.802 | 0.971 | 1.66x10 <sup>-09</sup> |
| SMAD7    | -1.039 | -1.141 | -0.586 | -0.938 | 0.816 | 0.0002                 |
| TFF1     | 1.788  | 1.926  | 2.576  | 3.284  | 0.941 | 1.68x10 <sup>-07</sup> |
| TFPI2    | 2.460  | 2.592  | 2.664  | 3.729  | 0.769 | 0.0021                 |
| TGFBI    | 1.650  | 2.627  | 1.032  | 2.566  | 0.945 | 1.15x10 <sup>-07</sup> |
| TIMP1    | 2.585  | 4.195  | 1.987  | 3.450  | 0.978 | 2.83x10 <sup>-10</sup> |
| TJP1     | -0.981 | -0.686 | -0.430 | -0.128 | 0.691 | 0.0044                 |
| TRIM29   | 3.419  | 4.018  | 3.300  | 2.976  | 0.892 | 7.74x10 <sup>-06</sup> |
| VCAN     | 1.191  | 1.999  | 0.183  | 1.953  | 0.928 | 6.23x10 <sup>-07</sup> |
| VNN1     | 0.456  | 4.712  | 0.762  | 0.588  | 0.971 | 2.02x10 <sup>-09</sup> |
| WNT5A    | 1.229  | 2.740  | -0.166 | 2.357  | 0.964 | 6.93x10 <sup>-09</sup> |

---
